# Supplementary material for: The Neural Correlates of Impaired Self-Monitoring Among Individuals With Neurodegenerative Dementias
Source: Atypon-hosted journal article supplement (doi:10.1176/appi.neuropsych.17120349), 2019-01-03
Supplement: appi.neuropsych.17120349.ds001.pdf [file appi.neuropsych.17120349.ds001.pdf]

**Supplementary Table S1: Clusters and automatically labeled anatomic regions with significantly reduced gray matter volume in patients with dementia compared with healthy controls <sup>a,b</sup>**

|  | Cluster | Anatomical Labeling                                                                                                                                                                                                                                                                                                                                                                                                                                                                                                                                                                      | Voxels | MNI Coordinates X Y Z<br>(mm) |       |     | T value |
|--|---------|------------------------------------------------------------------------------------------------------------------------------------------------------------------------------------------------------------------------------------------------------------------------------------------------------------------------------------------------------------------------------------------------------------------------------------------------------------------------------------------------------------------------------------------------------------------------------------------|--------|-------------------------------|-------|-----|---------|
|  |         |                                                                                                                                                                                                                                                                                                                                                                                                                                                                                                                                                                                          |        |                               |       |     |         |
|  | 1       | Temporal_Inf_<br>Temporal_Mid_<br>Temporal_Mid_<br>Temporal_Inf_<br>Insula_L<br>Fusiform_<br>Temporal_Sup_R<br>Insula_R<br>ParaHippocampal_R<br>Fusiform_L<br>ParaHippocampal_L<br>Rectus_L<br>Temporal_Pole_Mid_R<br>Hippocampus_L<br>Frontal_Inf_Oper_L<br>Rectus_R<br>Putamen_L<br>Putamen_R<br>Temporal_Pole_Sup_R<br>Frontal_Inf_Orb_L<br>Frontal_Med_Orb_L<br>Precentral_L<br>Amygdala_R<br>Frontal_Sup_Orb_L<br>Hippocampus_R<br>Olfactory_R<br>Olfactory_L<br>Frontal_Med_Orb_R<br>Frontal_Inf_Orb_R<br>Frontal_Inf_Tri_L<br>Rolandic_Oper_L<br>Frontal_Inf_Oper_R<br>Amygdala_L | 22877  | -48                           | -46.5 | -18 | 5.41    |

|  |    |                                                                                                                                                                                                                                                                                    |     |       |       |      |      |
|--|----|------------------------------------------------------------------------------------------------------------------------------------------------------------------------------------------------------------------------------------------------------------------------------------|-----|-------|-------|------|------|
|  |    | Occipital_Inf_L<br>Cingulum_Ant_L<br>Caudate_R<br>Temporal_Pole_Sup_L<br>Frontal_Sup_Orb_R<br>Frontal_Inf_Tri_R<br>Temporal_Pole_Mid_L<br>Cingulum_Ant_R<br>Lingual_L<br>Caudate_L<br>Frontal_Mid_L<br>Temporal_Sup_L<br>Thalamus_L<br>Pallidum_L<br>Rolandic_Oper_R<br>Thalamus_R |     |       |       |      |      |
|  | 2  | Frontal_Inf_Tri_<br>Frontal_Mid_<br>Frontal_Inf_Oper_R                                                                                                                                                                                                                             | 57  | 37.5  | 27    | 28.5 | 5.02 |
|  | 3  | Frontal_Inf_Oper_<br>Precentral_<br>Frontal_Mid_R                                                                                                                                                                                                                                  | 165 | 39    | 7.5   | 30   | 5.03 |
|  | 4  | Frontal_Mid_<br>Frontal_Sup_L                                                                                                                                                                                                                                                      | 45  | -27   | 33    | 31.5 | 4.97 |
|  | 5  | Frontal_Sup_<br>Frontal_Mid_L                                                                                                                                                                                                                                                      | 80  | -16.5 | 49.5  | 28.5 | 5.01 |
|  | 6  | Cingulum_Ant_<br>Frontal_Sup_Medial_L                                                                                                                                                                                                                                              | 197 | -7.5  | 40.5  | 19.5 | 4.92 |
|  | 7  | Cingulum_Ant_R                                                                                                                                                                                                                                                                     | 82  | 12    | 43.5  | 16.5 | 4.95 |
|  | 8  | Frontal_Mid_<br>Precentral_<br>Frontal_Sup_R                                                                                                                                                                                                                                       | 39  | 27    | 0     | 49.5 | 4.88 |
|  | 9  | Cingulum_Mid_<br>Precuneus_<br>Cingulum_Post_R                                                                                                                                                                                                                                     | 83  | 10.5  | -52.5 | 34.5 | 4.82 |
|  | 10 | Temporal_Sup_L<br>Rolandic_Oper_L                                                                                                                                                                                                                                                  | 36  | -54   | 0     | 0    | 4.83 |
|  | 11 | Frontal_Mid_L                                                                                                                                                                                                                                                                      | 20  | -22.5 | 22.5  | 49.5 | 4.75 |

<sup>a</sup> L/R = Left/Right, *Caudate* = Caudate Nucleus, *Cingulum\_Ant* = Anterior Cingulate gyrus,

*Frontal\_Inf\_Oper* = Inferior Frontal gyrus, Pars opercularis, *Frontal\_Inf\_Orb* = Inferior Frontal gyrus, Pars Orbitalis, *Frontal\_Inf\_Tri* = Inferior Frontal gyrus, Pars Triangularis, *Frontal\_Med\_Orb* = Middle Frontal gyrus, Orbital part, *Frontal\_Mid* = Middle Frontal gyrus, *Frontal\_Sup\_Orb* = Superior Frontal gyrus, Orbital part, *Fusiform* = Fusiform gyrus, *Lingual* = Lingual gyrus, *Occipital\_Inf* = Inferior Occipital cortex, *Olfactory* = Olfactory cortex, *Pallidum* = globus Pallidus, *ParaHippocampal* = Parahippocampal gyrus, *Precentral* = Precentral gyrus, *Rectus* = Rectus gyrus, *Rolandic\_Oper* = Rolandic Operculum, *Temporal\_Inf* = Inferior Temporal gyrus, *Temporal\_Mid* = Middle Temporal gyrus, *Temporal\_Pole\_Mid* = Middle Temporal Pole, *Temporal\_Pole\_Sup* = Superior Temporal Pole, *Temporal\_Sup* = Superior Temporal gyrus, *FEW* = Family Wise Error  
<sup>b</sup>  $p < 0.05$ , FWE correction
